# Supplementary material for: Breast cancer patient delay in Fukushima, Japan following the 2011 triple disaster: a long-term retrospective study
Source: BMC Cancer. 2017 Jun 19;17:423. doi: 10.1186/s12885-017-3412-4 (PMC5477136; doi:10.1186/s12885-017-3412-4)
Supplement: Supplementary file 2 — Patient characteristics of total patient delay pre- and post-disaster. (XLSX 13 kb) [file 12885_2017_3412_MOESM2_ESM.xlsx]

## Sheet: Delay
Additional file 2. Patient characteristics of total patient delay pre- and post-disaster
	Pre-disaster (N=122)		Post-disaster (N=97)
	total patient delay		total patient delay
Characteristics	No (N=100)	Yes (N=22)	No (N=68)	Yes (N=29)
Age (N, %)
–50]	20 (20.0)	5 (22.7)	12 (17.7)	4 (13.8)
(50–65]	34 (34.0)	7 (31.8)	22 (32.4)	11 (37.9)
(65–	46 (46.0)	10 (45.5)	34 (50.0)	14 (48.3)
Engaged in a full-time job (N, %)
Yes	19 (19.0)	5 (22.7)	14 (20.6)	8 (27.6)
No	81 (81.0)	17 (77.3)	54 (79.4)	21 (72.4)
Number of cohabitant family members† (N, %)	2 (0-7)	3 (0-7)	2 (0-6)	1 (0-5)
Living with a partner (N, %)
Yes	54 (54.0)	12 (54.6)	43 (63.2)	20 (69.0)
No	41 (41.0)	9 (40.9)	25 (36.8)	9 (31.0)
Missing	5 (5.0)	1 (4.6)	0 (0.0)	0 (0.0)
Living with children (N, %)
Yes	59 (59.0)	13 (59.1)	35 (51.5)	11 (37.9)
No	36 (36.0)	8 (36.4)	33 (48.5)	18 (62.1)
Missing	5 (5.0)	1 (4.6)	0 (0.0)	0 (0.0)
Presence of lump (N, %)
Yes	87 (87.0)	19 (86.4)	66 (97.1)	25 (86.2)
No	13 (13.0)	3 (13.6)	2 (2.9)	4 (13.8)
Hormone receptor (N, %)
Positive	65 (65.0)	15 (68.2)	63 (92.7)	26 (89.7)
Negative	31 (31.0)	6 (27.3)	5 (7.4)	3 (10.3)
Missing	4 (4.0)	1 (4.6)	0 (0.0)	0 (0.0)
Stage (N, %)
0	10 (10.0)	1 (4.6)	5 (7.4)	0 (0.0)
I	27 (27.0)	6 (27.3)	26 (38.2)	3 (10.3)
II	41 (41.0)	7 (31.8)	30 (44.1)	12 (41.4)
III	20 (20.0)	7 (31.8)	6 (8.8)	8 (27.6)
IV	2 (2.0)	1 (4.6)	1 (1.5)	6 (20.7)
ASA Physicial classification system (N, %)
Normal healthy patient	50 (50.0)	9 (40.9)	30 (44.1)	10 (34.5)
Patient with mild systemic disease	40 (40.0)	10 (45.5)	33 (48.5)	14 (48.3)
Patient with severe systemic disease	10 (10.0)	3 (13.6)	5 (7.4)	5 (17.2)
Body Mass Index (kg/m2, N, %)
–25]	63 (63.0)	12 (54.6)	45 (66.2)	17 (58.6)
(25–30]	23 (23.0)	6 (27.3)	17 (25.0)	11 (37.9)
(30–	10 (10.0)	4 (18.2)	5 (7.4)	1 (3.5)
Missing	4 (4.0)	0 (0.0)	1 (1.5)	0 (0.0)
History of benign breast disease (N, %)
Yes	6 (6.0)	1 (4.6)	4 (5.9)	2 (6.9)
No	94 (94.0)	21 (95.5)	64 (94.1)	27 (93.1)
History of breast cancer (N, %)
Yes	2 (2.0)	0 (0.0)	1 (1.5)	1 (3.5)
No	98 (98.0)	22 (100.0)	67 (98.5)	28 (96.6)
Undertook mammography screening within past two years (N, %)
Yes	10 (10.0)	5 (22.7)	9 (13.2)	3 (10.3)
No	90 (90.0)	17 (77.3)	59 (86.8)	26 (89.7)
Family history of any cancer (N, %)
Yes	39 (39.0)	11 (50.0)	37 (54.4)	9 (31.0)
No	58 (58.0)	10 (45.5)	31 (45.6)	20 (69.0)
Missing	3 (3.0)	1 (4.6)	0 (0.0)	0 (0.0)
Hospital (N, %)
Minamisoma Municipal General Hospital	11 (11.0)	3 (13.6)	68 (100.0)	29 (100.0)
Watanabe Hospital	89 (89.0)	19 (86.4)	0 (0.0)	0 (0.0)
Distance from hospital (median (km), range)	3.3 (0.2-47.0)	6.2 (0.3-25.0)	3.3 (0.5-22.8)	3.3 (0.2-21.7)
Referral from other medical providers (N, %)
Yes	42 (42.0)	13 (59.1)	21 (30.9)	12 (41.4)
No	58 (58.0)	9 (40.9)	47 (69.1)	17 (58.6)
Days from first medical consultation to first examination†† (median, range)	0 (0-1096)	0 (0-14)	0 (0-282)	0 (0-676)
Residetial area‡ (N, %)
Non-evacuation zone of So-so district	12 (12.0)	1 (4.6)	11 (16.2)	4 (13.8)
Voluntary evacuation zone	58 (58.0)	13 (59.1)	48 (70.6)	22 (75.9)
Mandatory evacuation zone	30 (30.0)	8 (36.4)	9 (13.2)	3 (10.3)
Exempt from medical fees††† (N, %)
Yes	NA	NA	57 (83.8)	25 (86.2)
No	NA	NA	11 (16.2)	4 (13.8)
Air dose rate†††§ (average(µSv/h), age)	NA	NA	0.28 (0-1.1)	0.26 (0.13-0.77)
† Data is missing in five pre-disaster patients.
†† Data is missing in one post-disaster patient.
‡ For pre-disaster patients, this indicates place of residence at the time of first medical consultation, and for post-disaster patients, indicates place of residence at the time of Japan's triple disaster.
††† Data is available only among post-disaster patients.
§ This indicates approximate air dose rate at home at the time of first medical consultation.
